# Supplementary material for: Association between WHO First-Step Analgesic Use and Risk of Breast Cancer in Women of Working Age
Source: MDPI journal article supplement (doi:10.3390/ph16020323), 2023-02-20
Supplement: s1 [file s1]

**Supplementary Table S1.** HRs associated with cancer development in a cohort of 6735 patients for acetaminophen and NSAIDs.

| Variables                                      | HR <sup>(a)</sup> | 95% CI <sup>(b)</sup> | <i>p</i>  |
|------------------------------------------------|-------------------|-----------------------|-----------|
| Economic activity                              |                   |                       |           |
| Not participating                              | 1.000             |                       |           |
| Participating                                  | 1.539             | 1.343–1.764           | 0.000 *** |
| Income                                         |                   |                       |           |
| Low (1~3)                                      | 1.000             |                       |           |
| Middle (4~6)                                   | 1.673             | 1.419–1.973           | 0.000 *** |
| High (7~10)                                    | 3.083             | 2.642–3.598           | 0.000 *** |
| Body mass index (BMI)                          | 0.995             | 0.979–1.011           | 0.515     |
| Total cholesterol                              | 0.998             | 0.997–1.000           | 0.008 **  |
| Alcohol intake                                 |                   |                       |           |
| Never                                          | 1.000             |                       |           |
| Ever                                           | 0.966             | 0.852–1.094           | 0.585     |
| Smoking                                        |                   |                       |           |
| Never                                          | 1.000             |                       |           |
| Ever                                           | 0.642             | 0.500–0.824           | 0.000 *** |
| Exercise                                       |                   |                       |           |
| Never                                          | 1.000             |                       |           |
| Ever                                           | 0.835             | 0.750–0.930           | 0.001 **  |
| Charlson Comorbidity Index (CCI)               |                   |                       |           |
| 0                                              | 1.000             |                       |           |
| 1                                              | 0.988             | 0.865–1.129           | 0.862     |
| 2                                              | 1.115             | 0.939–1.324           | 0.215     |
| ≥3                                             | 1.119             | 0.925–1.354           | 0.246     |
| Acetaminophen                                  |                   |                       |           |
| Never                                          | 1.000             |                       |           |
| Non-regular                                    | 0.960             | 0.851–1.083           | 0.507     |
| Regular                                        | 0.813             | 0.651–1.015           | 0.067 *   |
| Non-steroidal anti-inflammatory drugs (NSAIDs) |                   |                       |           |
| Never                                          | 1.000             |                       |           |
| Non-regular                                    | 0.905             | 0.861–1.093           | 0.621     |
| Regular                                        | 0.748             | 0.570–1.010           | 0.058 *   |

<sup>(a)</sup>HR: hazard ratio, <sup>(b)</sup>CI: confidence interval. \*  $p > 0.1$ , \*\*  $p > 0.05$ , \*\*\*  $p > 0.001$ .

**Supplementary Table S2.** Risk of breast cancer by specific working-age group for acetaminophen and NSAIDs.

| Model 2 <sup>(a)</sup>                                | Young-aged (25~39) |                       |          | Middle-aged (40~49) |             |          | Senior-aged (50~64) |             |          |
|-------------------------------------------------------|--------------------|-----------------------|----------|---------------------|-------------|----------|---------------------|-------------|----------|
|                                                       | HR <sup>(b)</sup>  | 95% CI <sup>(c)</sup> | <i>p</i> | HR                  | 95% CI      | <i>p</i> | HR                  | 95% CI      | <i>p</i> |
| <b>Acetaminophen</b>                                  |                    |                       |          |                     |             |          |                     |             |          |
| Never                                                 | 1.000              |                       |          | 1.000               |             |          | 1.000               |             |          |
| Non-regular                                           | 1.007              | 0.824–1.232           | 0.943    | 0.953               | 0.785–1.157 | 0.626    | 0.913               | 0.717–1.163 | 0.461    |
| Regular                                               | 0.687              | 1.392–3.018           | 0.063 *  | 0.915               | 0.630–1.330 | 0.643    | 0.809               | 0.546–1.199 | 0.291    |
| <b>Non-steroidal anti-inflammatory drugs (NSAIDs)</b> |                    |                       |          |                     |             |          |                     |             |          |
| Never                                                 | 1.000              |                       |          | 1.000               |             |          | 1.000               |             |          |
| Non-regular                                           | 0.945              | 0.777–1.151           | 0.576    | 1.075               | 0.888–1.301 | 0.457    | 0.900               | 0.704–1.149 | 0.397    |
| Regular                                               | 0.732              | 0.338–1.586           | 0.430    | 0.707               | 0.388–1.288 | 0.257    | 0.797               | 0.539–1.180 | 0.257    |

<sup>(a)</sup>adjusted for income (low, middle, high), BMI, total cholesterol, alcohol intake, smoking and exercise (never, ever). <sup>(b)</sup>HR: hazard ratio, <sup>(c)</sup>CI: confidence interval. \*  $p > 0.1$ , Model 2: Analysis results of the inhibitory effect of acetaminophen and NSAIDs on cancer occurrence.
